# Supplementary material for: Sorting and decoration of semiconducting single-walled carbon nanotubes via the quaternization reaction
Source: Royal Society of Chemistry journal article supplement (doi:10.1039/d0ra08591j), 2021-01-01
Supplement: d0ra08591j1.pdf [file d0ra08591j1.pdf]

## Supporting Information

### Sorting and Decoration of Semiconducting Single-walled Carbon Nanotubes via Quaternization Reaction

Ying Luo,<sup>a</sup> Yuemaierjiang Maimaiti<sup>a</sup>, Xieraili Maimaitiyiming,<sup>\*a</sup> Chuang Xie<sup>b</sup> and Tiezhu Pei<sup>b</sup>

**corresponding author E-mail:** 380731363@qq.com

<sup>a</sup>Key Laboratory of Energy Materials Chemistry, Ministry of Education; Key Laboratory of Advanced Functional Materials, Autonomous Region; Institute of Applied Chemistry, College of Chemistry, Xinjiang University, Urumqi, 830046, Xinjiang, PR China.

<sup>b</sup>National Engineering Research Center of Industrial Crystallization Technology, School of Chemical Engineering and Technology, Tianjin University, Tianjin 300072, Peoples R China.

#### Table of Contents

|                                                              |    |
|--------------------------------------------------------------|----|
| 1. Materials and Characterization.....                       | S2 |
| 2. Enrichment of sc-SWCNTs using a series of Copolymer.....  | S2 |
| 3. Quaternization Procedure of PFPy-50@SWCNTs Complexes..... | S5 |

## 1. Materials and Characterization

All the chemicals used were of analytical grade. Dichloromethane ( $\text{CH}_2\text{Cl}_2$ ), toluene (TL), [(*o*-tol) $_3\text{P}$ ] $_2\text{Pd}$  (0) and methanol (MeOH) were purchased from Shanghai Fine Chemical Materials Research Institute., Shanghai, China. Reflux under  $110^\circ\text{C}$ , toluene was distilled off in the metal sodium powder and dried.

PAFPD-50-Br\*: Poly (9, 9-bis (3'- ((N, N- dimethyl)- N- ethylammonium) -propyl) -2, 7- fluorene)-alt- 2, 7- (9, 9- dioctylfluorene) dibromide (PFPy-50-Br\*) was synthesized according to the literature [1]. The neutral polymer PFPy-50 (50 mg) was carried out under the protection of argon by stirring with bromoethane in DMSO/THF (1/4) at  $70^\circ\text{C}$  for 5 days. The synthetic process of polymers were shown in Scheme S1.

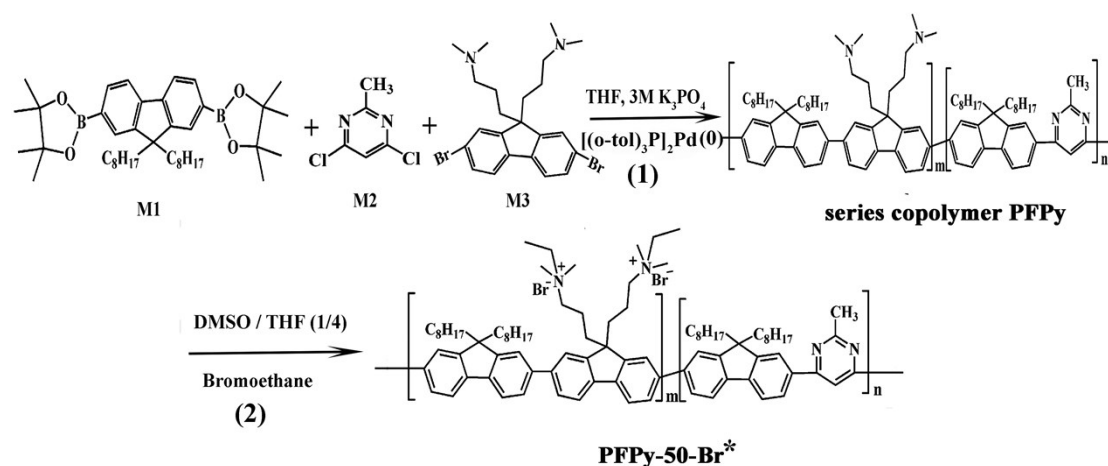

Scheme S1. The synthetic route of copolymers.

## 2. Enrichment of sc-SWCNTs with a series of polymers

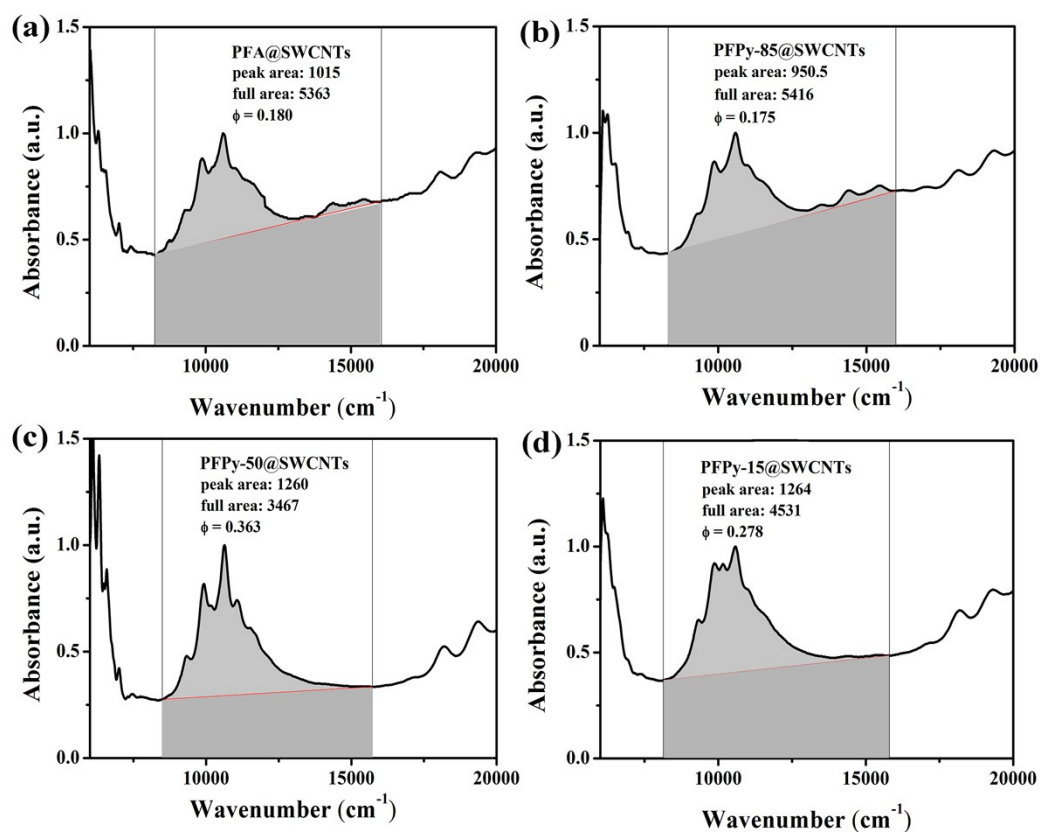

**Figure S1.**  $\phi$  value evaluation of sc-SWCNTs separated by (a) PFA, (b) PFPy-85, (c) PFPy-50 and (d) PFPy-15, converted from absorption spectra, ranging from  $8400\text{ cm}^{-1}$  to  $16000\text{ cm}^{-1}$ .

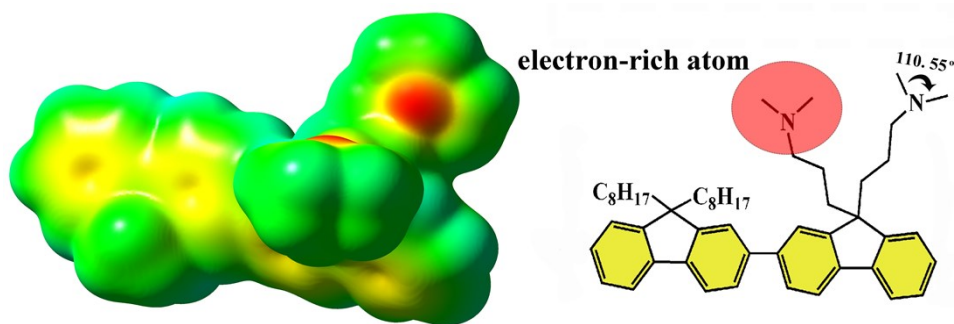

**Figure S2.** The electron-density maps of PFA. Red denotes electron-rich regions, green denotes less electron-rich regions and blue denotes electron-poor regions.

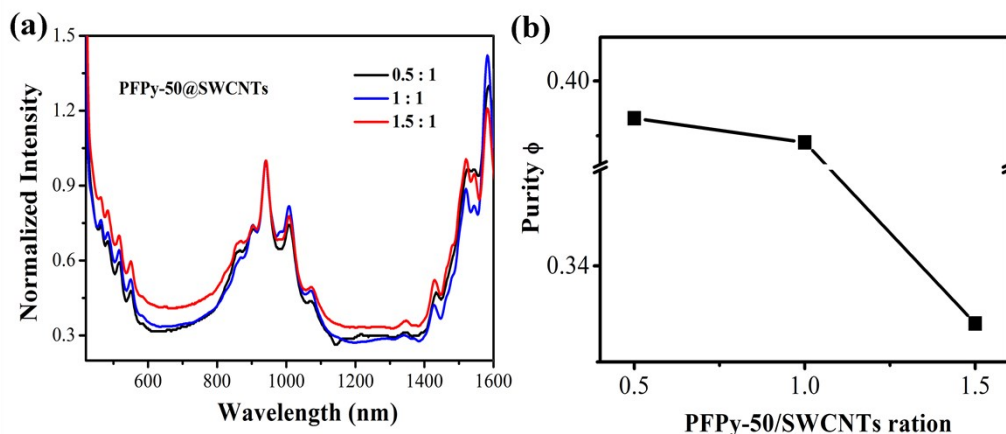

**Figure S3.** (a) UV-Vis-NIR spectra of PFPy-50: raw SWCNTs at 0.5:1, 1:1, and 1.5:1; (b)  $\phi$  value of sc-SWCNTs purity separated PFPy-50 with different proportions.

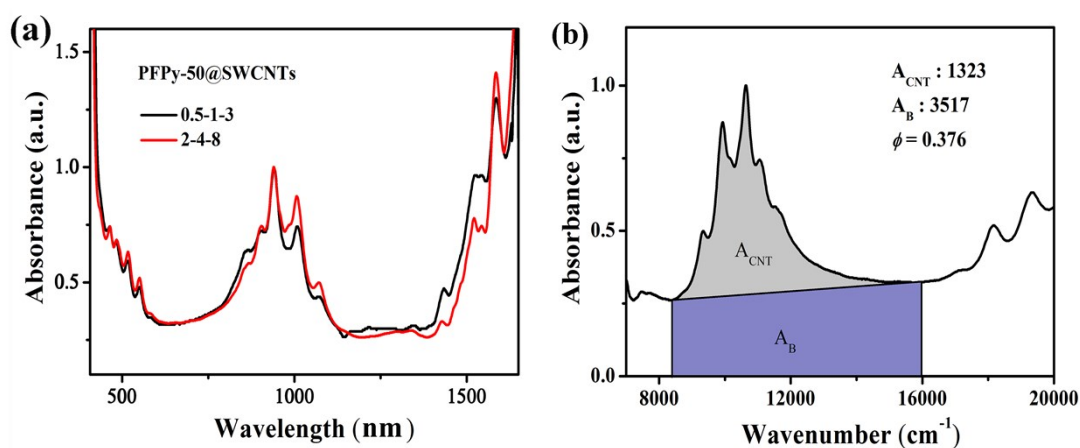

**Figure S4.** (a) Comparison of absorption spectra dispersion obtained from PFPy-50: raw SWCNTs at 0.5: 1 (black line) and 2: 4 (red line), respectively. (b)  $\phi$  value evaluation of PFPy-50@SWCNTs dispersion with PFPy-50: raw SWCNTs at 2:4.

**Different mass ratios operations of the polymer and raw SWCNTs:** The different mass (0.5, 1.0 and 1.5 mg) of the PFPy-50 were dissolved in 3.0 ml of TL and filtered through 0.22  $\mu\text{m}$  pore size filters before 1.0 mg of raw single-walled carbon nanotubes (raw SWCNTs) were added. The PFPy-50@SWCNTs dispersion was obtained by use of 200 W ultrasonication for 2 h under ice water ( $20^\circ\text{C}\pm 5^\circ\text{C}$ ). The dispersion was centrifuged at 20,000 rpm and  $10^\circ\text{C}$  to obtain a supernatant, which was used as a PFPy-50@SWCNTs dispersion.

### 3. The process of quaternization PFPy-50@SWCNTs complex

The PFPy-50/SWCNTs (0.5/1) ratio of excellent sorting purity were selected, and the mixed ratio was enlarged four times to 2/4 putting in 8 ml of TL. Then the mixture was sonicated for 2 h in an ice bath with temperature control. And PFPy-50@SWCNTs dispersion (Figure S5①) obtained to centrifuged 20,000 rpm for 30 min at 10°C, which the sc-SWCNTs purity reached  $\phi=0.376$  (Figure S4b). Two groups of PFPy-50@SWCNTs dispersion were prepared under the same conditions as above. One group of TL with the PFPy-50@SWCNTs dispersion evaporated, and the residues of the complex was dissolved in 4 mL of MeOH to sonicate 20 min for UV-vis-INR detection (as a **sample before QR in MeOH**). The other group of TL evaporated, and the residues of the complex were dissolved in 5 ml of THF. Then 0.6 ml of DMSO and 70  $\mu$ L of bromoethane were added under the protection of argon. After 5 days of reaction (Figure S5②), it was recrystallized from ethyl acetate and filtered through a 0.22  $\mu$ m nylon 66 filter (Figure S5③). Finally, the recrystallized PFPy-50-Br@SWCNTs complex was dispersed in 4 mL of MeOH by sonication for 20 min, as a **sample after QR in MeOH** (Figure S5④).

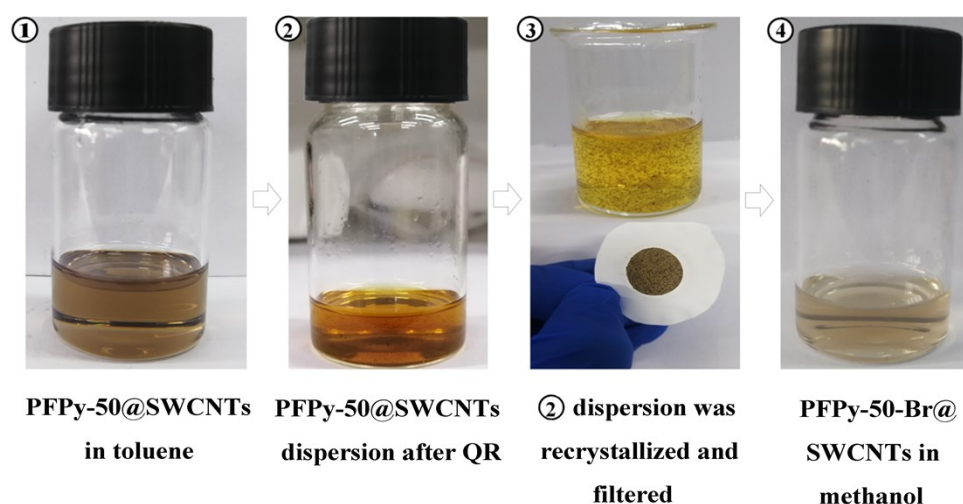

**Figure S5.** The whole process of the quaternization reaction for PFPy-50@SWCNTs was functionalized into alcohol-soluble PFPy-50-Br@SWCNTs.

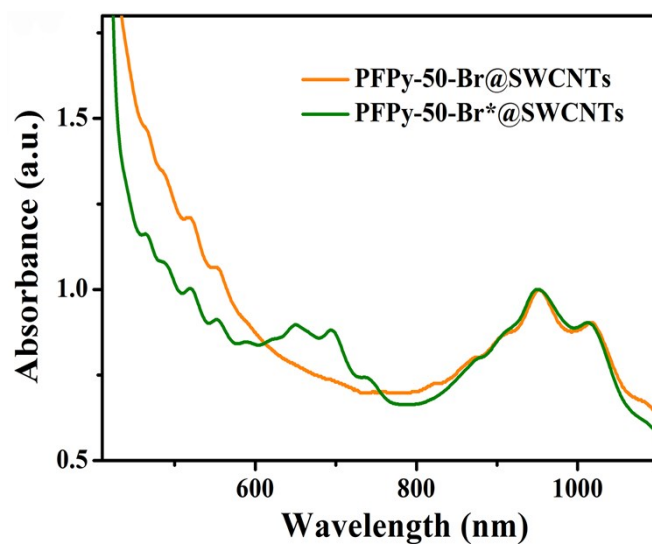

**Figure S6.** UV-vis-NIR spectra with PFPy-50-Br@SWCNTs (orange line) of post-QR and PFPy-50-Br\*@SWCNTs dispersion in MeOH (green line).

## References

1. Maimaiti, Y.; Maimaitiyiming, X. Fluorescence quenching of methanol-soluble polypyrimidine by aluminum ion. *Materials Express*. 2020, 7, 1177-1188.
